# Supplementary material
Source: PubMed Central journal article supplement (PMC9771995)
Supplement: NIHMS1831167-supplement-1.pdf [file NIHMS1831167-supplement-1.pdf]

|        |            | Residues |    |    |    |    |    |    |
|--------|------------|----------|----|----|----|----|----|----|
| 3p2d   | Number     | 9        | 10 | 11 | 12 | 13 | 20 | 21 |
|        | Amino Acid | V        | F  | K  | K  | S  | T  | V  |
| 3p2d_b | Number     | 9        | 10 | 11 | 12 | 13 | 20 | 21 |
|        | Amino Acid | V        | F  | K  | K  | S  | T  | V  |
| 1g4r   | Number     | 8        | 9  | 10 | 11 | 12 | 19 | 20 |
|        | Amino Acid | V        | F  | K  | K  | A  | T  | V  |
| 2wtr   | Number     | 8        | 9  | 10 | 11 | 12 | 19 | 20 |
|        | Amino Acid | V        | F  | K  | K  | A  | T  | V  |
| 2wtr_b | Number     | 8        | 9  | 10 | 11 | 12 | 19 | 20 |
|        | Amino Acid | V        | F  | K  | K  | A  | T  | V  |
| 6kl7   | Number     | 8        | 9  | 10 | 11 | 12 | 19 | 20 |
|        | Amino Acid | V        | F  | K  | K  | A  | T  | V  |
| 1g4m   | Number     | 8        | 9  | 10 | 11 | 12 | 19 | 20 |
|        | Amino Acid | V        | F  | K  | K  | A  | T  | V  |
| 1g4m_b | Number     | 8        | 9  | 10 | 11 | 12 | 19 | 20 |
|        | Amino Acid | V        | F  | K  | K  | A  | T  | V  |
| 1jsy   | Number     | 8        | 9  | 10 | 11 | 12 | 19 | 20 |
|        | Amino Acid | V        | F  | K  | K  | A  | T  | V  |
| 3gd1   | Number     | 8        | 9  | 10 | 11 | 12 | 19 | 20 |
|        | Amino Acid | V        | F  | K  | K  | A  | T  | V  |
| 1zsh   | Number     | 8        | 9  | 10 | 11 | 12 | 19 | 20 |
|        | Amino Acid | V        | F  | K  | K  | A  | T  | V  |
| 5tv1   | Number     | 9        | 10 | 11 | 12 | 13 | 20 | 21 |
|        | Amino Acid | V        | F  | K  | K  | S  | T  | V  |
| 6up7   | Number     | 8        | 9  | 10 | 11 | 12 | 19 | 20 |
|        | Amino Acid | V        | F  | K  | K  | A  | T  | V  |
| 6u1n   | Number     | 8        | 9  | 10 | 11 | 12 | 19 | 20 |
|        | Amino Acid | V        | F  | K  | K  | A  | T  | V  |
| 6tko   | Number     | 8        | 9  | 10 | 11 | 12 | 19 | 20 |
|        | Amino Acid | V        | F  | K  | K  | A  | T  | V  |
| 6pwc   | Number     | 8        | 9  | 10 | 11 | 12 | 19 | 20 |
|        | Amino Acid | V        | F  | K  | K  | A  | T  | V  |
| 6ni2   | Number     | 8        | 9  | 10 | 11 | 12 | 19 | 20 |
|        | Amino Acid | V        | F  | K  | K  | A  | T  | V  |
| 4jqj   | Number     | 8        | 9  | 10 | 11 | 12 | 19 | 20 |
|        | Amino Acid | V        | F  | K  | K  | A  | T  | V  |
| 7df9   | Number     | 8        | 9  | 10 | 11 | 12 | 19 | 20 |
|        | Amino Acid | V        | F  | K  | K  | A  | T  | V  |
| 7dfa   | Number     | 8        | 9  | 10 | 11 | 12 | 19 | 20 |
|        | Amino Acid | V        | F  | K  | K  | A  | T  | V  |
| 7dfb   | Number     | 8        | 9  | 10 | 11 | 12 | 19 | 20 |
|        | Amino Acid | V        | F  | K  | K  | A  | T  | V  |
| 7dfc   | Number     | 8        | 9  | 10 | 11 | 12 | 19 | 20 |
|        | Amino Acid | V        | F  | K  | K  | A  | T  | V  |
| 6k3f   | Number     | 9        | 10 | 11 | 12 | 13 | 20 | 21 |
|        | Amino Acid | V        | F  | K  | K  | S  | T  | V  |
| 6k3f_b | Number     | 9        | 10 | 11 | 12 | 13 | 20 | 21 |
|        | Amino Acid | V        | F  | K  | K  | S  | T  | V  |
| 6k3f_d | Number     | 9        | 10 | 11 | 12 | 13 | 20 | 21 |

|        |            |   |    |    |    |    |    |    |
|--------|------------|---|----|----|----|----|----|----|
|        | Amino Acid | V | F  | K  | K  | S  | T  | V  |
| 6k3f_e | Number     | 9 | 10 | 11 | 12 | 13 | 20 | 21 |
|        | Amino Acid | V | F  | K  | K  | S  | T  | V  |



|    |    |    |    |    |    |    |    |    |
|----|----|----|----|----|----|----|----|----|
| Y  | L  | D  | F  | V  | D  | V  | D  | G  |
| 22 | 23 | 27 | 28 | 29 | 30 | 38 | 39 | 40 |
| Y  | L  | D  | F  | V  | D  | V  | D  | G  |



|    |    |    |    |    |    |    |    |    |
|----|----|----|----|----|----|----|----|----|
| V  | V  | L  | D  | P  | D  | Y  | L  | K  |
| 41 | 42 | 43 | 45 | 46 | 47 | 48 | 49 | 50 |
| V  | V  | L  | D  | P  | D  | Y  | L  | K  |



|    |    |    |    |    |    |    |    |    |
|----|----|----|----|----|----|----|----|----|
| K  | V  | F  | V  | T  | L  | T  | C  | A  |
| 53 | 54 | 55 | 56 | 57 | 58 | 59 | 60 | 61 |
| K  | V  | F  | V  | T  | L  | T  | C  | A  |





|    |    |    |    |    |    |    |    |    |
|----|----|----|----|----|----|----|----|----|
| F  | R  | Y  | F  | R  | K  | D  | L  | F  |
| 62 | 63 | 64 | 76 | 77 | 78 | 79 | 80 | 81 |
| F  | R  | Y  | F  | R  | K  | D  | L  | F  |



|    |    |    |    |    |    |    |    |     |
|----|----|----|----|----|----|----|----|-----|
| I  | A  | T  | Y  | Q  | A  | F  | T  | R   |
| 82 | 83 | 84 | 85 | 86 | 87 | 88 | 99 | 100 |
| I  | A  | T  | Y  | Q  | A  | F  | T  | R   |

|     |     |     |     |     |     |     |     |     |
|-----|-----|-----|-----|-----|-----|-----|-----|-----|
| 101 | 102 | 103 | 104 | 105 | 106 | 107 | 108 | 109 |
| L   | Q   | E   | R   | L   | L   | R   | K   | L   |
| 101 | 102 | 103 | 104 | 105 | 106 | 107 | 108 | 109 |
| L   | Q   | E   | R   | L   | L   | R   | K   | L   |
| 100 | 101 | 102 | 103 | 104 | 105 | 106 | 107 | 108 |
| L   | Q   | E   | R   | L   | I   | K   | K   | L   |
| 100 | 101 | 102 | 103 | 104 | 105 | 106 | 107 | 108 |
| L   | Q   | E   | R   | L   | I   | K   | K   | L   |
| 100 | 101 | 102 | 103 | 104 | 105 | 106 | 107 | 108 |
| L   | Q   | E   | R   | L   | I   | K   | K   | L   |
| 100 | 101 | 102 | 103 | 104 | 105 | 106 | 107 | 108 |
| L   | Q   | E   | R   | L   | I   | K   | K   | L   |
| 100 | 101 | 102 | 103 | 104 | 105 | 106 | 107 | 108 |
| L   | Q   | E   | R   | L   | I   | K   | K   | L   |
| 100 | 101 | 102 | 103 | 104 | 105 | 106 | 107 | 108 |
| L   | Q   | E   | R   | L   | I   | K   | K   | L   |
| 100 | 101 | 102 | 103 | 104 | 105 | 106 | 107 | 108 |
| L   | Q   | E   | R   | L   | I   | K   | K   | L   |
| 100 | 101 | 102 | 103 | 104 | 105 | 106 | 107 | 108 |
| L   | Q   | E   | R   | L   | I   | K   | K   | L   |
| 100 | 101 | 102 | 103 | 104 | 105 | 106 | 107 | 108 |
| L   | Q   | E   | R   | L   | I   | K   | K   | L   |
| 100 | 101 | 102 | 103 | 104 | 105 | 106 | 107 | 108 |
| L   | Q   | E   | R   | L   | I   | K   | K   | L   |
| 100 | 101 | 102 | 103 | 104 | 105 | 106 | 107 | 108 |
| L   | Q   | E   | R   | L   | I   | K   | K   | L   |
| 100 | 101 | 102 | 103 | 104 | 105 | 106 | 107 | 108 |
| L   | Q   | E   | R   | L   | I   | K   | K   | L   |
| 100 | 101 | 102 | 103 | 104 | 105 | 106 | 107 | 108 |
| L   | Q   | E   | R   | L   | I   | K   | K   | L   |
| 100 | 101 | 102 | 103 | 104 | 105 | 106 | 107 | 108 |
| L   | Q   | E   | R   | L   | I   | K   | K   | L   |
| 101 | 102 | 103 | 104 | 105 | 106 | 107 | 108 | 109 |
| L   | Q   | D   | R   | L   | L   | K   | K   | L   |
| 101 | 102 | 103 | 104 | 105 | 106 | 107 | 108 | 109 |
| L   | Q   | D   | R   | L   | L   | K   | K   | L   |
| 101 | 102 | 103 | 104 | 105 | 106 | 107 | 108 | 109 |
| L   | Q   | E   | R   | L   | L   | K   | K   | L   |

|     |     |     |     |     |     |     |     |     |
|-----|-----|-----|-----|-----|-----|-----|-----|-----|
| L   | Q   | D   | R   | L   | L   | K   | K   | L   |
| 101 | 102 | 103 | 104 | 105 | 106 | 107 | 108 | 109 |
| L   | Q   | D   | R   | L   | L   | K   | K   | L   |



|     |     |     |     |     |     |     |     |     |
|-----|-----|-----|-----|-----|-----|-----|-----|-----|
| G   | A   | H   | P   | F   | F   | F   | V   | T   |
| 110 | 113 | 114 | 115 | 116 | 117 | 118 | 128 | 129 |
| G   | A   | H   | P   | F   | F   | F   | V   | T   |





|     |     |     |     |     |     |     |     |     |
|-----|-----|-----|-----|-----|-----|-----|-----|-----|
| L   | Q   | C   | G   | V   | D   | F   | E   | I   |
| 130 | 131 | 141 | 142 | 143 | 144 | 145 | 146 | 147 |
| L   | Q   | C   | G   | V   | D   | F   | E   | I   |

|     |     |     |     |     |     |     |     |     |
|-----|-----|-----|-----|-----|-----|-----|-----|-----|
| 148 | 149 | 150 | 151 | 152 | 160 | 161 | 162 | 163 |
| R   | A   | F   | C   | A   | H   | K   | R   | N   |
| 148 | 149 | 150 | 151 | 152 | 160 | 161 | 162 | 163 |
| R   | A   | F   | C   | A   | H   | K   | R   | N   |
| 147 | 148 | 149 | 150 | 151 | 159 | 160 | 161 | 162 |
| K   | A   | F   | C   | A   | H   | K   | R   | N   |
| 147 | 148 | 149 | 150 | 151 | 159 | 160 | 161 | 162 |
| K   | A   | F   | C   | A   | H   | K   | R   | N   |
| 147 | 148 | 149 | 150 | 151 | 159 | 160 | 161 | 162 |
| K   | A   | F   | C   | A   | H   | K   | R   | N   |
| 147 | 148 | 149 | 150 | 151 | 159 | 160 | 161 | 162 |
| K   | A   | F   | C   | A   | H   | K   | R   | N   |
| 147 | 148 | 149 | 150 | 151 | 159 | 160 | 161 | 162 |
| K   | A   | F   | C   | A   | H   | K   | R   | N   |
| 147 | 148 | 149 | 150 | 151 | 159 | 160 | 161 | 162 |
| K   | A   | F   | C   | A   | H   | K   | R   | N   |
| 147 | 148 | 149 | 150 | 151 | 159 | 160 | 161 | 162 |
| K   | A   | F   | C   | A   | H   | K   | R   | N   |
| 147 | 148 | 149 | 150 | 151 | 159 | 160 | 161 | 162 |
| K   | A   | F   | C   | A   | H   | K   | R   | N   |
| 147 | 148 | 149 | 150 | 151 | 159 | 160 | 161 | 162 |
| K   | A   | F   | C   | A   | H   | K   | R   | N   |
| 148 | 149 | 150 | 151 | 152 | 160 | 161 | 162 | 163 |
| R   | A   | F   | C   | A   | H   | K   | R   | N   |
| 147 | 148 | 149 | 150 | 151 | 159 | 160 | 161 | 162 |
| K   | A   | F   | V   | A   | H   | K   | R   | N   |
| 147 | 148 | 149 | 150 | 151 | 159 | 160 | 161 | 162 |
| K   | A   | F   | V   | A   | H   | K   | R   | N   |
| 147 | 148 | 149 | 150 | 151 | 159 | 160 | 161 | 162 |
| K   | A   | F   | C   | A   | H   | K   | R   | N   |
| 147 | 148 | 149 | 150 | 151 | 159 | 160 | 161 | 162 |
| K   | A   | F   | C   | A   | H   | K   | R   | N   |
| 147 | 148 | 149 | 150 | 151 | 159 | 160 | 161 | 162 |
| K   | A   | F   | C   | A   | H   | K   | R   | N   |
| 147 | 148 | 149 | 150 | 151 | 159 | 160 | 161 | 162 |
| K   | A   | F   | C   | A   | H   | K   | R   | N   |
| 147 | 148 | 149 | 150 | 151 | 159 | 160 | 161 | 162 |
| K   | A   | F   | C   | A   | H   | K   | R   | N   |
| 147 | 148 | 149 | 150 | 151 | 159 | 160 | 161 | 162 |
| K   | A   | F   | C   | A   | H   | K   | R   | N   |
| 148 | 149 | 150 | 151 | 152 | 160 | 161 | 162 | 163 |
| R   | A   | F   | C   | A   | H   | K   | R   | N   |
| 148 | 149 | 150 | 151 | 152 | 160 | 161 | 162 | 163 |
| R   | A   | F   | C   | A   | H   | K   | R   | N   |
| 148 | 149 | 150 | 151 | 152 | 160 | 161 | 162 | 163 |

|     |     |     |     |     |     |     |     |     |
|-----|-----|-----|-----|-----|-----|-----|-----|-----|
| R   | A   | F   | C   | A   | H   | K   | R   | N   |
| 148 | 149 | 150 | 151 | 152 | 160 | 161 | 162 | 163 |
| R   | A   | F   | C   | A   | H   | K   | R   | N   |

|     |     |     |     |     |     |     |     |     |
|-----|-----|-----|-----|-----|-----|-----|-----|-----|
| 164 | 165 | 166 | 167 | 168 | 169 | 170 | 171 | 172 |
| S   | V   | R   | L   | V   | I   | R   | K   | V   |
| 164 | 165 | 166 | 167 | 168 | 169 | 170 | 171 | 172 |
| S   | V   | R   | L   | V   | I   | R   | K   | V   |
| 163 | 164 | 165 | 166 | 167 | 168 | 169 | 170 | 171 |
| S   | V   | R   | L   | V   | I   | R   | K   | V   |
| 163 | 164 | 165 | 166 | 167 | 168 | 169 | 170 | 171 |
| S   | V   | R   | L   | V   | I   | R   | K   | V   |
| 163 | 164 | 165 | 166 | 167 | 168 | 169 | 170 | 171 |
| S   | V   | R   | L   | V   | I   | R   | K   | V   |
| 163 | 164 | 165 | 166 | 167 | 168 | 169 | 170 | 171 |
| S   | V   | R   | L   | V   | I   | R   | K   | V   |
| 163 | 164 | 165 | 166 | 167 | 168 | 169 | 170 | 171 |
| S   | V   | R   | L   | V   | I   | R   | K   | V   |
| 163 | 164 | 165 | 166 | 167 | 168 | 169 | 170 | 171 |
| S   | V   | R   | L   | V   | I   | R   | K   | V   |
| 163 | 164 | 165 | 166 | 167 | 168 | 169 | 170 | 171 |
| S   | V   | R   | L   | V   | I   | R   | K   | V   |
| 163 | 164 | 165 | 166 | 167 | 168 | 169 | 170 | 171 |
| S   | V   | R   | L   | V   | I   | R   | K   | V   |
| 163 | 164 | 165 | 166 | 167 | 168 | 169 | 170 | 171 |
| S   | V   | R   | L   | V   | I   | R   | K   | V   |
| 164 | 165 | 166 | 167 | 168 | 169 | 170 | 171 | 172 |
| S   | V   | R   | L   | V   | I   | R   | K   | V   |
| 163 | 164 | 165 | 166 | 167 | 168 | 169 | 170 | 171 |
| S   | V   | R   | L   | V   | I   | R   | K   | V   |
| 163 | 164 | 165 | 166 | 167 | 168 | 169 | 170 | 171 |
| S   | V   | R   | L   | V   | I   | R   | K   | V   |
| 163 | 164 | 165 | 166 | 167 | 168 | 169 | 170 | 171 |
| S   | V   | R   | L   | V   | I   | R   | K   | V   |
| 163 | 164 | 165 | 166 | 167 | 168 | 169 | 170 | 171 |
| S   | V   | R   | L   | V   | I   | R   | K   | V   |
| 163 | 164 | 165 | 166 | 167 | 168 | 169 | 170 | 171 |
| S   | V   | R   | L   | V   | I   | R   | K   | V   |
| 163 | 164 | 165 | 166 | 167 | 168 | 169 | 170 | 171 |
| S   | V   | R   | L   | V   | I   | R   | K   | V   |
| 163 | 164 | 165 | 166 | 167 | 168 | 169 | 170 | 171 |
| S   | V   | R   | L   | V   | I   | R   | K   | V   |
| 164 | 165 | 166 | 167 | 168 | 169 | 170 | 171 | 172 |
| S   | V   | R   | L   | I   | I   | R   | K   | V   |
| 164 | 165 | 166 | 167 | 168 | 169 | 170 | 171 | 172 |
| S   | V   | R   | L   | I   | I   | R   | K   | V   |
| 164 | 165 | 166 | 167 | 168 | 169 | 170 | 171 | 172 |
| S   | V   | R   | L   | V   | I   | R   | K   | V   |

|     |     |     |     |     |     |     |     |     |
|-----|-----|-----|-----|-----|-----|-----|-----|-----|
| S   | V   | R   | L   | I   | I   | R   | K   | V   |
| 164 | 165 | 166 | 167 | 168 | 169 | 170 | 171 | 172 |
| S   | V   | R   | L   | I   | I   | R   | K   | V   |

|     |     |     |     |     |     |     |     |     |
|-----|-----|-----|-----|-----|-----|-----|-----|-----|
| 173 | 184 | 185 | 186 | 187 | 188 | 189 | 190 | 197 |
| Q   | S   | A   | E   | T   | T   | R   | H   | S   |
| 173 | 184 | 185 | 186 | 187 | 188 | 189 | 190 | 197 |
| Q   | S   | A   | E   | T   | T   | R   | H   | S   |
| 172 | 183 | 184 | 185 | 186 | 187 | 188 | 189 | 196 |
| Q   | T   | A   | E   | T   | T   | R   | Q   | P   |
| 172 | 183 | 184 | 185 | 186 | 187 | 188 | 189 | 196 |
| Q   | T   | A   | E   | T   | T   | R   | Q   | P   |
| 172 | 183 | 184 | 185 | 186 | 187 | 188 | 189 | 196 |
| Q   | T   | A   | E   | T   | T   | R   | Q   | P   |
| 172 | 183 | 184 | 185 | 186 | 187 | 188 | 189 | 196 |
| Q   | T   | A   | E   | T   | T   | R   | Q   | P   |
| 172 | 183 | 184 | 185 | 186 | 187 | 188 | 189 | 196 |
| Q   | T   | A   | E   | T   | T   | R   | Q   | P   |
| 172 | 183 | 184 | 185 | 186 | 187 | 188 | 189 | 196 |
| Q   | T   | A   | E   | T   | T   | R   | Q   | P   |
| 172 | 183 | 184 | 185 | 186 | 187 | 188 | 189 | 196 |
| Q   | T   | A   | E   | T   | T   | R   | Q   | P   |
| 173 | 184 | 185 | 186 | 187 | 188 | 189 | 190 | 197 |
| Q   | S   | A   | E   | T   | T   | R   | H   | S   |
| 172 | 183 | 184 | 185 | 186 | 187 | 188 | 189 | 196 |
| Q   | T   | A   | E   | T   | T   | R   | Q   | P   |
| 172 | 183 | 184 | 185 | 186 | 187 | 188 | 189 | 196 |
| Q   | T   | A   | E   | T   | T   | R   | Q   | P   |
| 172 | 183 | 184 | 185 | 186 | 187 | 188 | 189 | 196 |
| Q   | T   | A   | E   | T   | T   | R   | Q   | P   |
| 172 | 183 | 184 | 185 | 186 | 187 | 188 | 189 | 196 |
| Q   | T   | A   | E   | T   | T   | R   | Q   | P   |
| 172 | 183 | 184 | 185 | 186 | 187 | 188 | 189 | 196 |
| Q   | T   | A   | E   | T   | T   | R   | Q   | P   |
| 172 | 183 | 184 | 185 | 186 | 187 | 188 | 189 | 196 |
| Q   | T   | A   | E   | T   | T   | R   | Q   | P   |
| 172 | 183 | 184 | 185 | 186 | 187 | 188 | 189 | 196 |
| Q   | T   | A   | E   | T   | T   | R   | Q   | P   |
| 173 | 184 | 185 | 186 | 187 | 188 | 189 | 190 | 198 |
| Q   | S   | A   | E   | T   | T   | R   | H   | S   |
| 173 | 184 | 185 | 186 | 187 | 188 | 189 | 190 | 198 |
| Q   | S   | A   | E   | T   | T   | R   | H   | S   |
| 173 | 184 | 185 | 186 | 187 | 188 | 189 | 190 | 198 |

|     |     |     |     |     |     |     |     |     |
|-----|-----|-----|-----|-----|-----|-----|-----|-----|
| Q   | S   | A   | E   | T   | T   | R   | H   | S   |
| 173 | 184 | 185 | 186 | 187 | 188 | 189 | 190 | 198 |
| Q   | S   | A   | E   | T   | T   | R   | H   | S   |



|     |     |     |     |     |     |     |     |     |
|-----|-----|-----|-----|-----|-----|-----|-----|-----|
| 198 | 199 | 200 | 201 | 202 | 203 | 204 | 208 | 209 |
| L   | H   | L   | E   | A   | S   | L   | L   | Y   |
| 198 | 199 | 200 | 201 | 202 | 203 | 204 | 208 | 209 |
| L   | H   | L   | E   | A   | S   | L   | L   | Y   |
| 197 | 198 | 199 | 200 | 201 | 202 | 203 | 207 | 208 |
| L   | H   | L   | E   | A   | S   | L   | I   | Y   |
| 197 | 198 | 199 | 200 | 201 | 202 | 203 | 207 | 208 |
| L   | H   | L   | E   | A   | S   | L   | I   | Y   |
| 197 | 198 | 199 | 200 | 201 | 202 | 203 | 207 | 208 |
| L   | H   | L   | E   | A   | S   | L   | I   | Y   |
| 197 | 198 | 199 | 200 | 201 | 202 | 203 | 207 | 208 |
| L   | H   | L   | E   | A   | S   | L   | I   | Y   |
| 197 | 198 | 199 | 200 | 201 | 202 | 203 | 207 | 208 |
| L   | H   | L   | E   | A   | S   | L   | I   | Y   |
| 197 | 198 | 199 | 200 | 201 | 202 | 203 | 207 | 208 |
| L   | H   | L   | E   | A   | S   | L   | I   | Y   |
| 197 | 198 | 199 | 200 | 201 | 202 | 203 | 207 | 208 |
| L   | H   | L   | E   | A   | S   | L   | I   | Y   |
| 197 | 198 | 199 | 200 | 201 | 202 | 203 | 207 | 208 |
| L   | H   | L   | E   | A   | S   | L   | I   | Y   |
| 197 | 198 | 199 | 200 | 201 | 202 | 203 | 207 | 208 |
| L   | H   | L   | E   | A   | S   | L   | I   | Y   |
| 197 | 198 | 199 | 200 | 201 | 202 | 203 | 207 | 208 |
| L   | H   | L   | E   | A   | S   | L   | I   | Y   |
| 197 | 198 | 199 | 200 | 201 | 202 | 203 | 207 | 208 |
| L   | H   | L   | E   | A   | S   | L   | I   | Y   |
| 197 | 198 | 199 | 200 | 201 | 202 | 203 | 207 | 208 |
| L   | H   | L   | E   | A   | S   | L   | I   | Y   |
| 197 | 198 | 199 | 200 | 201 | 202 | 203 | 207 | 208 |
| L   | H   | L   | E   | A   | S   | L   | I   | Y   |
| 197 | 198 | 199 | 200 | 201 | 202 | 203 | 207 | 208 |
| L   | H   | L   | E   | A   | S   | L   | I   | Y   |
| 199 | 200 | 201 | 202 | 203 | 204 | 208 | 209 | 210 |
| L   | H   | L   | E   | A   | S   | E   | L   | Y   |
| 199 | 200 | 201 | 202 | 203 | 204 | 208 | 209 | 210 |
| L   | H   | L   | E   | A   | S   | E   | L   | Y   |
| 199 | 200 | 201 | 202 | 203 | 204 | 208 | 209 | 210 |
| L   | H   | L   | E   | A   | S   | E   | L   | Y   |

|     |     |     |     |     |     |     |     |     |
|-----|-----|-----|-----|-----|-----|-----|-----|-----|
| L   | H   | L   | E   | A   | S   | E   | L   | Y   |
| 199 | 200 | 201 | 202 | 203 | 204 | 208 | 209 | 210 |
| L   | H   | L   | E   | A   | S   | E   | L   | Y   |

|     |     |     |     |     |     |     |     |     |
|-----|-----|-----|-----|-----|-----|-----|-----|-----|
| 210 | 215 | 216 | 217 | 218 | 219 | 220 | 221 | 222 |
| Y   | L   | N   | V   | N   | V   | H   | V   | T   |
| 210 | 215 | 216 | 217 | 218 | 219 | 220 | 221 | 222 |
| Y   | L   | N   | V   | N   | V   | H   | V   | T   |
| 209 | 214 | 215 | 216 | 217 | 218 | 219 | 220 | 221 |
| Y   | I   | S   | V   | N   | V   | H   | V   | T   |
| 209 | 214 | 215 | 216 | 217 | 218 | 219 | 220 | 221 |
| Y   | I   | S   | V   | N   | V   | H   | V   | T   |
| 209 | 214 | 215 | 216 | 217 | 218 | 219 | 220 | 221 |
| Y   | I   | S   | V   | N   | V   | H   | V   | T   |
| 209 | 214 | 215 | 216 | 217 | 218 | 219 | 220 | 221 |
| Y   | I   | S   | V   | N   | V   | H   | V   | T   |
| 209 | 214 | 215 | 216 | 217 | 218 | 219 | 220 | 221 |
| Y   | I   | S   | V   | N   | V   | H   | V   | T   |
| 209 | 214 | 215 | 216 | 217 | 218 | 219 | 220 | 221 |
| Y   | I   | S   | V   | N   | V   | H   | V   | T   |
| 209 | 214 | 215 | 216 | 217 | 218 | 219 | 220 | 221 |
| Y   | I   | S   | V   | N   | V   | H   | V   | T   |
| 209 | 214 | 215 | 216 | 217 | 218 | 219 | 220 | 221 |
| Y   | I   | S   | V   | N   | V   | H   | V   | T   |
| 209 | 214 | 215 | 216 | 217 | 218 | 219 | 220 | 221 |
| Y   | I   | S   | V   | N   | V   | H   | V   | T   |
| 209 | 214 | 215 | 216 | 217 | 218 | 219 | 220 | 221 |
| Y   | I   | S   | V   | N   | V   | H   | V   | T   |
| 209 | 214 | 215 | 216 | 217 | 218 | 219 | 220 | 221 |
| Y   | I   | S   | V   | N   | V   | H   | V   | T   |
| 209 | 214 | 215 | 216 | 217 | 218 | 219 | 220 | 221 |
| Y   | I   | S   | V   | N   | V   | H   | V   | T   |
| 209 | 214 | 215 | 216 | 217 | 218 | 219 | 220 | 221 |
| Y   | I   | S   | V   | N   | V   | H   | V   | T   |
| 209 | 214 | 215 | 216 | 217 | 218 | 219 | 220 | 221 |
| Y   | I   | S   | V   | N   | V   | H   | V   | T   |
| 209 | 214 | 215 | 216 | 217 | 218 | 219 | 220 | 221 |
| Y   | I   | S   | V   | N   | V   | H   | V   | T   |
| 215 | 216 | 217 | 218 | 219 | 220 | 221 | 222 | 223 |
| P   | L   | N   | V   | N   | V   | H   | V   | T   |
| 215 | 216 | 217 | 218 | 219 | 220 | 221 | 222 | 223 |
| P   | L   | N   | V   | N   | V   | H   | V   | T   |
| 215 | 216 | 217 | 218 | 219 | 220 | 221 | 222 | 223 |

|     |     |     |     |     |     |     |     |     |
|-----|-----|-----|-----|-----|-----|-----|-----|-----|
| P   | L   | N   | V   | N   | V   | H   | V   | T   |
| 215 | 216 | 217 | 218 | 219 | 220 | 221 | 222 | 223 |
| P   | L   | N   | V   | N   | V   | H   | V   | T   |

|     |     |     |     |     |     |     |     |     |
|-----|-----|-----|-----|-----|-----|-----|-----|-----|
| 223 | 229 | 230 | 231 | 232 | 233 | 234 | 235 | 236 |
| N   | V   | K   | K   | I   | K   | V   | S   | V   |
| 223 | 229 | 230 | 231 | 232 | 233 | 234 | 235 | 236 |
| N   | V   | K   | K   | I   | K   | V   | S   | V   |
| 222 | 228 | 229 | 230 | 231 | 232 | 233 | 234 | 235 |
| N   | V   | K   | K   | I   | K   | I   | S   | V   |
| 222 | 228 | 229 | 230 | 231 | 232 | 233 | 234 | 235 |
| N   | V   | K   | K   | I   | K   | I   | S   | V   |
| 222 | 228 | 229 | 230 | 231 | 232 | 233 | 234 | 235 |
| N   | V   | K   | K   | I   | K   | I   | S   | V   |
| 222 | 228 | 229 | 230 | 231 | 232 | 233 | 234 | 235 |
| N   | V   | K   | K   | I   | K   | I   | S   | V   |
| 222 | 228 | 229 | 230 | 231 | 232 | 233 | 234 | 235 |
| N   | V   | K   | K   | I   | K   | I   | S   | V   |
| 222 | 228 | 229 | 230 | 231 | 232 | 233 | 234 | 235 |
| N   | V   | K   | K   | I   | K   | I   | S   | V   |
| 222 | 228 | 229 | 230 | 231 | 232 | 233 | 234 | 235 |
| N   | V   | K   | K   | I   | K   | I   | S   | V   |
| 222 | 228 | 229 | 230 | 231 | 232 | 233 | 234 | 235 |
| N   | V   | K   | K   | I   | K   | I   | S   | V   |
| 222 | 228 | 229 | 230 | 231 | 232 | 233 | 234 | 235 |
| N   | V   | K   | K   | I   | K   | I   | S   | V   |
| 222 | 228 | 229 | 230 | 231 | 232 | 233 | 234 | 235 |
| N   | V   | K   | K   | I   | K   | I   | S   | V   |
| 222 | 228 | 229 | 230 | 231 | 232 | 233 | 234 | 235 |
| N   | V   | K   | K   | I   | K   | I   | S   | V   |
| 222 | 228 | 229 | 230 | 231 | 232 | 233 | 234 | 235 |
| N   | V   | K   | K   | I   | K   | I   | S   | V   |
| 222 | 228 | 229 | 230 | 231 | 232 | 233 | 234 | 235 |
| N   | V   | K   | K   | I   | K   | I   | S   | V   |
| 222 | 228 | 229 | 230 | 231 | 232 | 233 | 234 | 235 |
| N   | V   | K   | K   | I   | K   | I   | S   | V   |
| 222 | 228 | 229 | 230 | 231 | 232 | 233 | 234 | 235 |
| N   | V   | K   | K   | I   | K   | I   | S   | V   |
| 229 | 230 | 231 | 232 | 233 | 234 | 235 | 236 | 237 |
| T   | V   | K   | K   | I   | R   | V   | S   | V   |
| 229 | 230 | 231 | 232 | 233 | 234 | 235 | 236 | 237 |
| T   | V   | K   | K   | I   | R   | V   | S   | V   |
| 229 | 230 | 231 | 232 | 233 | 234 | 235 | 236 | 237 |

|     |     |     |     |     |     |     |     |     |
|-----|-----|-----|-----|-----|-----|-----|-----|-----|
| T   | V   | K   | K   | I   | R   | V   | S   | V   |
| 229 | 230 | 231 | 232 | 233 | 234 | 235 | 236 | 237 |
| T   | V   | K   | K   | I   | R   | V   | S   | V   |



|     |     |     |     |     |     |     |     |     |
|-----|-----|-----|-----|-----|-----|-----|-----|-----|
| R   | Q   | Y   | A   | D   | T   | A   | Q   | Y   |
| 238 | 239 | 240 | 241 | 242 | 248 | 249 | 250 | 251 |
| R   | Q   | Y   | A   | D   | T   | A   | Q   | Y   |



|     |     |     |     |     |     |     |     |     |
|-----|-----|-----|-----|-----|-----|-----|-----|-----|
| 251 | 252 | 253 | 254 | 255 | 256 | 257 | 258 | 259 |
| K   | C   | P   | V   | A   | Q   | V   | E   | Q   |
| 251 | 252 | 253 | 254 | 255 | 256 | 257 | 258 | 259 |
| K   | C   | P   | V   | A   | Q   | V   | E   | Q   |
| 250 | 251 | 252 | 253 | 254 | 255 | 256 | 257 | 258 |
| K   | C   | P   | V   | A   | M   | E   | E   | A   |
| 250 | 251 | 252 | 253 | 254 | 255 | 256 | 257 | 258 |
| K   | C   | P   | V   | A   | M   | E   | E   | A   |
| 250 | 251 | 252 | 253 | 254 | 255 | 256 | 257 | 258 |
| K   | C   | P   | V   | A   | M   | E   | E   | A   |
| 250 | 251 | 252 | 253 | 254 | 255 | 256 | 257 | 258 |
| K   | C   | P   | V   | A   | M   | E   | E   | A   |
| 250 | 251 | 252 | 253 | 254 | 255 | 256 | 257 | 258 |
| K   | C   | P   | V   | A   | M   | E   | E   | A   |
| 250 | 251 | 252 | 253 | 254 | 255 | 256 | 257 | 258 |
| K   | C   | P   | V   | A   | M   | E   | E   | A   |
| 250 | 251 | 252 | 253 | 254 | 255 | 256 | 257 | 258 |
| K   | C   | P   | V   | A   | M   | E   | E   | A   |
| 251 | 252 | 253 | 254 | 255 | 256 | 257 | 258 | 259 |
| K   | C   | P   | V   | A   | Q   | V   | E   | Q   |
| 250 | 251 | 252 | 253 | 254 | 255 | 256 | 257 | 258 |
| K   | V   | P   | V   | A   | M   | E   | E   | A   |
| 250 | 251 | 252 | 253 | 254 | 255 | 256 | 257 | 258 |
| K   | V   | P   | V   | A   | M   | E   | E   | A   |
| 250 | 251 | 252 | 253 | 254 | 255 | 256 | 257 | 258 |
| K   | C   | P   | V   | A   | M   | E   | E   | A   |
| 250 | 251 | 252 | 253 | 254 | 255 | 256 | 257 | 258 |
| K   | C   | P   | V   | A   | M   | E   | E   | A   |
| 250 | 251 | 252 | 253 | 254 | 255 | 256 | 257 | 258 |
| K   | C   | P   | V   | A   | M   | E   | E   | A   |
| 250 | 251 | 252 | 253 | 254 | 255 | 256 | 257 | 258 |
| K   | C   | P   | V   | A   | M   | E   | E   | A   |
| 250 | 251 | 252 | 253 | 254 | 255 | 256 | 257 | 258 |
| K   | C   | P   | V   | A   | M   | E   | E   | A   |
| 252 | 253 | 254 | 255 | 256 | 257 | 258 | 259 | 267 |
| K   | C   | P   | V   | A   | Q   | L   | E   | S   |
| 252 | 253 | 254 | 255 | 256 | 257 | 258 | 259 | 267 |
| K   | C   | P   | V   | A   | Q   | L   | E   | S   |
| 252 | 253 | 254 | 255 | 256 | 257 | 258 | 259 | 267 |

|     |     |     |     |     |     |     |     |     |
|-----|-----|-----|-----|-----|-----|-----|-----|-----|
| K   | C   | P   | V   | A   | Q   | L   | E   | S   |
| 252 | 253 | 254 | 255 | 256 | 257 | 258 | 259 | 267 |
| K   | C   | P   | V   | A   | Q   | L   | E   | S   |

|     |     |     |     |     |     |     |     |     |
|-----|-----|-----|-----|-----|-----|-----|-----|-----|
| 267 | 268 | 269 | 270 | 271 | 272 | 273 | 274 | 275 |
| S   | T   | F   | C   | K   | V   | Y   | T   | I   |
| 267 | 268 | 269 | 270 | 271 | 272 | 273 | 274 | 275 |
| S   | T   | F   | C   | K   | V   | Y   | T   | I   |
| 266 | 267 | 268 | 269 | 270 | 271 | 272 | 273 | 274 |
| S   | T   | F   | C   | K   | V   | Y   | T   | L   |
| 266 | 267 | 268 | 269 | 270 | 271 | 272 | 273 | 274 |
| S   | T   | F   | C   | K   | V   | Y   | T   | L   |
| 266 | 267 | 268 | 269 | 270 | 271 | 272 | 273 | 274 |
| S   | T   | F   | C   | K   | V   | Y   | T   | L   |
| 266 | 267 | 268 | 269 | 270 | 271 | 272 | 273 | 274 |
| S   | T   | F   | C   | K   | V   | Y   | T   | L   |
| 266 | 267 | 268 | 269 | 270 | 271 | 272 | 273 | 274 |
| S   | T   | F   | C   | K   | V   | Y   | T   | L   |
| 266 | 267 | 268 | 269 | 270 | 271 | 272 | 273 | 274 |
| S   | T   | F   | C   | K   | V   | Y   | T   | L   |
| 266 | 267 | 268 | 269 | 270 | 271 | 272 | 273 | 274 |
| S   | T   | F   | C   | K   | V   | Y   | T   | L   |
| 267 | 268 | 269 | 270 | 271 | 272 | 273 | 274 | 275 |
| S   | T   | F   | C   | K   | V   | Y   | T   | I   |
| 266 | 267 | 268 | 269 | 270 | 271 | 272 | 273 | 274 |
| S   | T   | F   | S   | K   | V   | Y   | T   | L   |
| 266 | 267 | 268 | 269 | 270 | 271 | 272 | 273 | 274 |
| S   | T   | F   | S   | K   | V   | Y   | T   | L   |
| 266 | 267 | 268 | 269 | 270 | 271 | 272 | 273 | 274 |
| S   | T   | F   | C   | K   | V   | Y   | T   | L   |
| 266 | 267 | 268 | 269 | 270 | 271 | 272 | 273 | 274 |
| S   | T   | F   | C   | K   | V   | Y   | T   | L   |
| 266 | 267 | 268 | 269 | 270 | 271 | 272 | 273 | 274 |
| S   | T   | F   | C   | K   | V   | Y   | T   | L   |
| 266 | 267 | 268 | 269 | 270 | 271 | 272 | 273 | 274 |
| S   | T   | F   | C   | K   | V   | Y   | T   | L   |
| 266 | 267 | 268 | 269 | 270 | 271 | 272 | 273 | 274 |
| S   | T   | F   | C   | K   | V   | Y   | T   | L   |
| 268 | 269 | 270 | 271 | 272 | 273 | 274 | 275 | 282 |
| S   | T   | F   | C   | K   | V   | Y   | T   | D   |
| 268 | 269 | 270 | 271 | 272 | 273 | 274 | 275 | 282 |
| S   | T   | F   | C   | K   | V   | Y   | T   | D   |
| 268 | 269 | 270 | 271 | 272 | 273 | 274 | 275 | 282 |
| S   | T   | F   | C   | K   | V   | Y   | T   | D   |

|     |     |     |     |     |     |     |     |     |
|-----|-----|-----|-----|-----|-----|-----|-----|-----|
| S   | T   | F   | C   | K   | V   | Y   | T   | D   |
| 268 | 269 | 270 | 271 | 272 | 273 | 274 | 275 | 282 |
| S   | T   | F   | C   | K   | V   | Y   | T   | D   |

|     |     |     |     |     |     |     |     |     |
|-----|-----|-----|-----|-----|-----|-----|-----|-----|
| 282 | 283 | 284 | 285 | 286 | 287 | 288 | 289 | 290 |
| N   | R   | E   | K   | R   | G   | L   | A   | L   |
| 282 | 283 | 284 | 285 | 286 | 287 | 288 | 289 | 290 |
| N   | R   | E   | K   | R   | G   | L   | A   | L   |
| 281 | 282 | 283 | 284 | 285 | 286 | 287 | 288 | 289 |
| N   | R   | E   | K   | R   | G   | L   | A   | L   |
| 281 | 282 | 283 | 284 | 285 | 286 | 287 | 288 | 289 |
| N   | R   | E   | K   | R   | G   | L   | A   | L   |
| 281 | 282 | 283 | 284 | 285 | 286 | 287 | 288 | 289 |
| N   | R   | E   | K   | R   | G   | L   | A   | L   |
| 281 | 282 | 283 | 284 | 285 | 286 | 287 | 288 | 289 |
| N   | R   | E   | K   | R   | G   | L   | A   | L   |
| 281 | 282 | 283 | 284 | 285 | 286 | 287 | 288 | 289 |
| N   | R   | E   | K   | R   | G   | L   | A   | L   |
| 281 | 282 | 283 | 284 | 285 | 286 | 287 | 288 | 289 |
| N   | R   | E   | K   | R   | G   | L   | A   | L   |
| 281 | 282 | 283 | 284 | 285 | 286 | 287 | 288 | 289 |
| N   | R   | E   | K   | R   | G   | L   | A   | L   |
| 281 | 282 | 283 | 284 | 285 | 286 | 287 | 288 | 289 |
| N   | R   | E   | K   | R   | G   | L   | A   | L   |
| 281 | 282 | 283 | 284 | 285 | 286 | 287 | 288 | 289 |
| N   | R   | E   | K   | R   | G   | L   | A   | L   |
| 281 | 282 | 283 | 284 | 285 | 286 | 287 | 288 | 289 |
| N   | R   | E   | K   | R   | G   | L   | A   | L   |
| 281 | 282 | 283 | 284 | 285 | 286 | 287 | 288 | 289 |
| N   | R   | E   | K   | R   | G   | L   | A   | L   |
| 281 | 282 | 283 | 284 | 285 | 286 | 287 | 288 | 289 |
| N   | R   | E   | K   | R   | G   | L   | A   | L   |
| 281 | 282 | 283 | 284 | 285 | 286 | 287 | 288 | 289 |
| N   | R   | E   | K   | R   | G   | L   | A   | L   |
| 281 | 282 | 283 | 284 | 285 | 286 | 287 | 288 | 289 |
| N   | R   | E   | K   | R   | G   | L   | A   | L   |
| 281 | 282 | 283 | 284 | 285 | 286 | 287 | 288 | 289 |
| N   | R   | E   | K   | R   | G   | L   | A   | L   |
| 283 | 284 | 285 | 286 | 287 | 288 | 289 | 290 | 291 |
| N   | R   | E   | K   | R   | G   | L   | A   | L   |
| 283 | 284 | 285 | 286 | 287 | 288 | 289 | 290 | 291 |
| N   | R   | E   | K   | R   | G   | L   | A   | L   |
| 283 | 284 | 285 | 286 | 287 | 288 | 289 | 290 | 291 |

|     |     |     |     |     |     |     |     |     |
|-----|-----|-----|-----|-----|-----|-----|-----|-----|
| N   | R   | E   | K   | R   | G   | L   | A   | L   |
| 283 | 284 | 285 | 286 | 287 | 288 | 289 | 290 | 291 |
| N   | R   | E   | K   | R   | G   | L   | A   | L   |

|     |     |     |     |     |     |     |     |     |
|-----|-----|-----|-----|-----|-----|-----|-----|-----|
| 291 | 292 | 293 | 294 | 295 | 296 | 297 | 298 | 299 |
| D   | G   | K   | L   | K   | H   | E   | D   | T   |
| 291 | 292 | 293 | 294 | 295 | 296 | 297 | 298 | 299 |
| D   | G   | K   | L   | K   | H   | E   | D   | T   |
| 290 | 291 | 292 | 293 | 294 | 295 | 296 | 297 | 298 |
| D   | G   | K   | L   | K   | H   | E   | D   | T   |
| 290 | 291 | 292 | 293 | 294 | 295 | 296 | 297 | 298 |
| D   | G   | K   | L   | K   | H   | E   | D   | T   |
| 290 | 291 | 292 | 293 | 294 | 295 | 296 | 297 | 298 |
| D   | G   | K   | L   | K   | H   | E   | D   | T   |
| 290 | 291 | 292 | 293 | 294 | 295 | 296 | 297 | 298 |
| D   | G   | K   | L   | K   | H   | E   | D   | T   |
| 290 | 291 | 292 | 293 | 294 | 295 | 296 | 297 | 298 |
| D   | G   | K   | L   | K   | H   | E   | D   | T   |
| 290 | 291 | 292 | 293 | 294 | 295 | 296 | 297 | 298 |
| D   | G   | K   | L   | K   | H   | E   | D   | T   |
| 290 | 291 | 292 | 293 | 294 | 295 | 296 | 297 | 298 |
| D   | G   | K   | L   | K   | H   | E   | D   | T   |
| 291 | 292 | 293 | 294 | 295 | 296 | 297 | 298 | 299 |
| D   | G   | K   | L   | K   | H   | E   | D   | T   |
| 290 | 291 | 292 | 293 | 294 | 295 | 296 | 297 | 298 |
| D   | G   | K   | L   | K   | H   | E   | D   | T   |
| 290 | 291 | 292 | 293 | 294 | 295 | 296 | 297 | 298 |
| D   | G   | K   | L   | K   | H   | E   | D   | T   |
| 290 | 291 | 292 | 293 | 294 | 295 | 296 | 297 | 298 |
| D   | G   | K   | L   | K   | H   | E   | D   | T   |
| 290 | 291 | 292 | 293 | 294 | 295 | 296 | 297 | 298 |
| D   | G   | K   | L   | K   | H   | E   | D   | T   |
| 290 | 291 | 292 | 293 | 294 | 295 | 296 | 297 | 298 |
| D   | G   | K   | L   | K   | H   | E   | D   | T   |
| 290 | 291 | 292 | 293 | 294 | 295 | 296 | 297 | 298 |
| D   | G   | K   | L   | K   | H   | E   | D   | T   |
| 290 | 291 | 292 | 293 | 294 | 295 | 296 | 297 | 298 |
| D   | G   | K   | L   | K   | H   | E   | D   | T   |
| 292 | 293 | 294 | 295 | 296 | 297 | 298 | 299 | 300 |
| D   | G   | Q   | L   | K   | H   | E   | D   | T   |
| 292 | 293 | 294 | 295 | 296 | 297 | 298 | 299 | 300 |
| D   | G   | Q   | L   | K   | H   | E   | D   | T   |
| 292 | 293 | 294 | 295 | 296 | 297 | 298 | 299 | 300 |
| D   | G   | Q   | L   | K   | H   | E   | D   | T   |

|     |     |     |     |     |     |     |     |     |
|-----|-----|-----|-----|-----|-----|-----|-----|-----|
| D   | G   | Q   | L   | K   | H   | E   | D   | T   |
| 292 | 293 | 294 | 295 | 296 | 297 | 298 | 299 | 300 |
| D   | G   | Q   | L   | K   | H   | E   | D   | T   |





|     |     |     |     |     |     |     |     |     |
|-----|-----|-----|-----|-----|-----|-----|-----|-----|
| N   | L   | A   | S   | S   | T   | I   | K   | E   |
| 301 | 302 | 303 | 304 | 305 | 306 | 307 | 314 | 315 |
| N   | L   | A   | S   | S   | T   | I   | K   | E   |

|     |     |     |     |     |     |     |     |     |
|-----|-----|-----|-----|-----|-----|-----|-----|-----|
| 315 | 316 | 317 | 318 | 319 | 320 | 321 | 322 | 323 |
| V   | L   | G   | I   | L   | V   | S   | Y   | R   |
| 315 | 316 | 317 | 318 | 319 | 320 | 321 | 322 | 323 |
| V   | L   | G   | I   | L   | V   | S   | Y   | R   |
| 314 | 315 | 316 | 317 | 318 | 319 | 320 | 321 | 322 |
| I   | L   | G   | I   | I   | V   | S   | Y   | K   |
| 314 | 315 | 316 | 317 | 318 | 319 | 320 | 321 | 322 |
| I   | L   | G   | I   | I   | V   | S   | Y   | K   |
| 314 | 315 | 316 | 317 | 318 | 319 | 320 | 321 | 322 |
| I   | L   | G   | I   | I   | V   | S   | Y   | K   |
| 314 | 315 | 316 | 317 | 318 | 319 | 320 | 321 | 322 |
| I   | L   | G   | I   | I   | V   | S   | Y   | K   |
| 314 | 315 | 316 | 317 | 318 | 319 | 320 | 321 | 322 |
| I   | L   | G   | I   | I   | V   | S   | Y   | K   |
| 314 | 315 | 316 | 317 | 318 | 319 | 320 | 321 | 322 |
| I   | L   | G   | I   | I   | V   | S   | Y   | K   |
| 314 | 315 | 316 | 317 | 318 | 319 | 320 | 321 | 322 |
| I   | L   | G   | I   | I   | V   | S   | Y   | K   |
| 314 | 315 | 316 | 317 | 318 | 319 | 320 | 321 | 322 |
| I   | L   | G   | I   | I   | V   | S   | Y   | K   |
| 315 | 316 | 317 | 318 | 319 | 320 | 321 | 322 | 323 |
| V   | L   | G   | I   | L   | V   | S   | Y   | R   |
| 314 | 315 | 316 | 317 | 318 | 319 | 320 | 321 | 322 |
| I   | L   | G   | I   | I   | V   | S   | Y   | K   |
| 314 | 315 | 316 | 317 | 318 | 319 | 320 | 321 | 322 |
| I   | L   | G   | I   | I   | V   | S   | Y   | K   |
| 314 | 315 | 316 | 317 | 318 | 319 | 320 | 321 | 322 |
| I   | L   | G   | I   | I   | V   | S   | Y   | K   |
| 314 | 315 | 316 | 317 | 318 | 319 | 320 | 321 | 322 |
| I   | L   | G   | I   | I   | V   | S   | Y   | K   |
| 314 | 315 | 316 | 317 | 318 | 319 | 320 | 321 | 322 |
| I   | L   | G   | I   | I   | V   | S   | Y   | K   |
| 314 | 315 | 316 | 317 | 318 | 319 | 320 | 321 | 322 |
| I   | L   | G   | I   | I   | V   | S   | Y   | K   |
| 314 | 315 | 316 | 317 | 318 | 319 | 320 | 321 | 322 |
| I   | L   | G   | I   | I   | V   | S   | Y   | K   |
| 316 | 317 | 318 | 319 | 320 | 321 | 322 | 323 | 324 |
| V   | L   | G   | I   | L   | V   | S   | Y   | R   |
| 316 | 317 | 318 | 319 | 320 | 321 | 322 | 323 | 324 |
| V   | L   | G   | I   | L   | V   | S   | Y   | R   |
| 316 | 317 | 318 | 319 | 320 | 321 | 322 | 323 | 324 |

|     |     |     |     |     |     |     |     |     |
|-----|-----|-----|-----|-----|-----|-----|-----|-----|
| V   | L   | G   | I   | L   | V   | S   | Y   | R   |
| 316 | 317 | 318 | 319 | 320 | 321 | 322 | 323 | 324 |
| V   | L   | G   | I   | L   | V   | S   | Y   | R   |



|     |     |     |     |     |     |     |     |     |
|-----|-----|-----|-----|-----|-----|-----|-----|-----|
| V   | K   | V   | K   | L   | V   | V   | D   | V   |
| 325 | 326 | 327 | 328 | 329 | 330 | 331 | 336 | 337 |
| V   | K   | V   | K   | L   | V   | V   | D   | V   |



|     |     |     |     |     |     |     |     |     |
|-----|-----|-----|-----|-----|-----|-----|-----|-----|
| S   | V   | E   | L   | P   | F   | V   | L   | M   |
| 338 | 339 | 340 | 341 | 342 | 343 | 344 | 345 | 346 |
| S   | V   | E   | L   | P   | F   | V   | L   | M   |



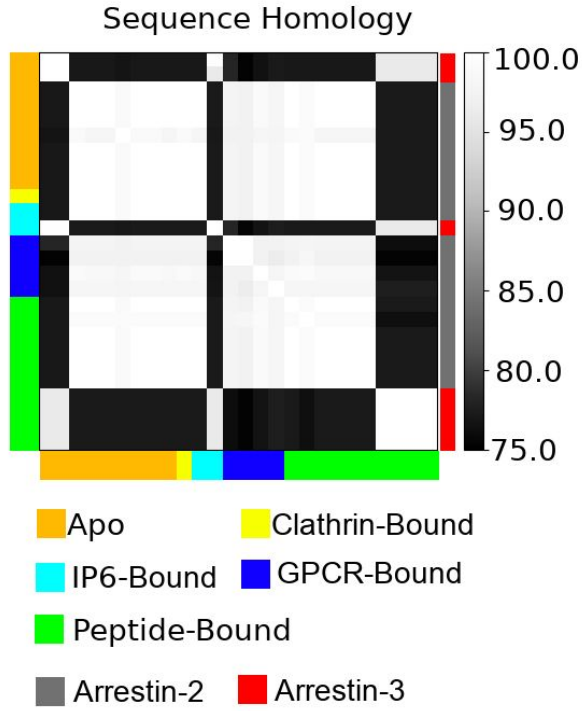

**Figure S1:** A pairwise comparison of sequence homology between all used structures in this study. Structures are color coded both by their ligands (left and bottom of graph), or whether they are arrestin-2 (gray) or arrestin-3 (red) (right of graph).



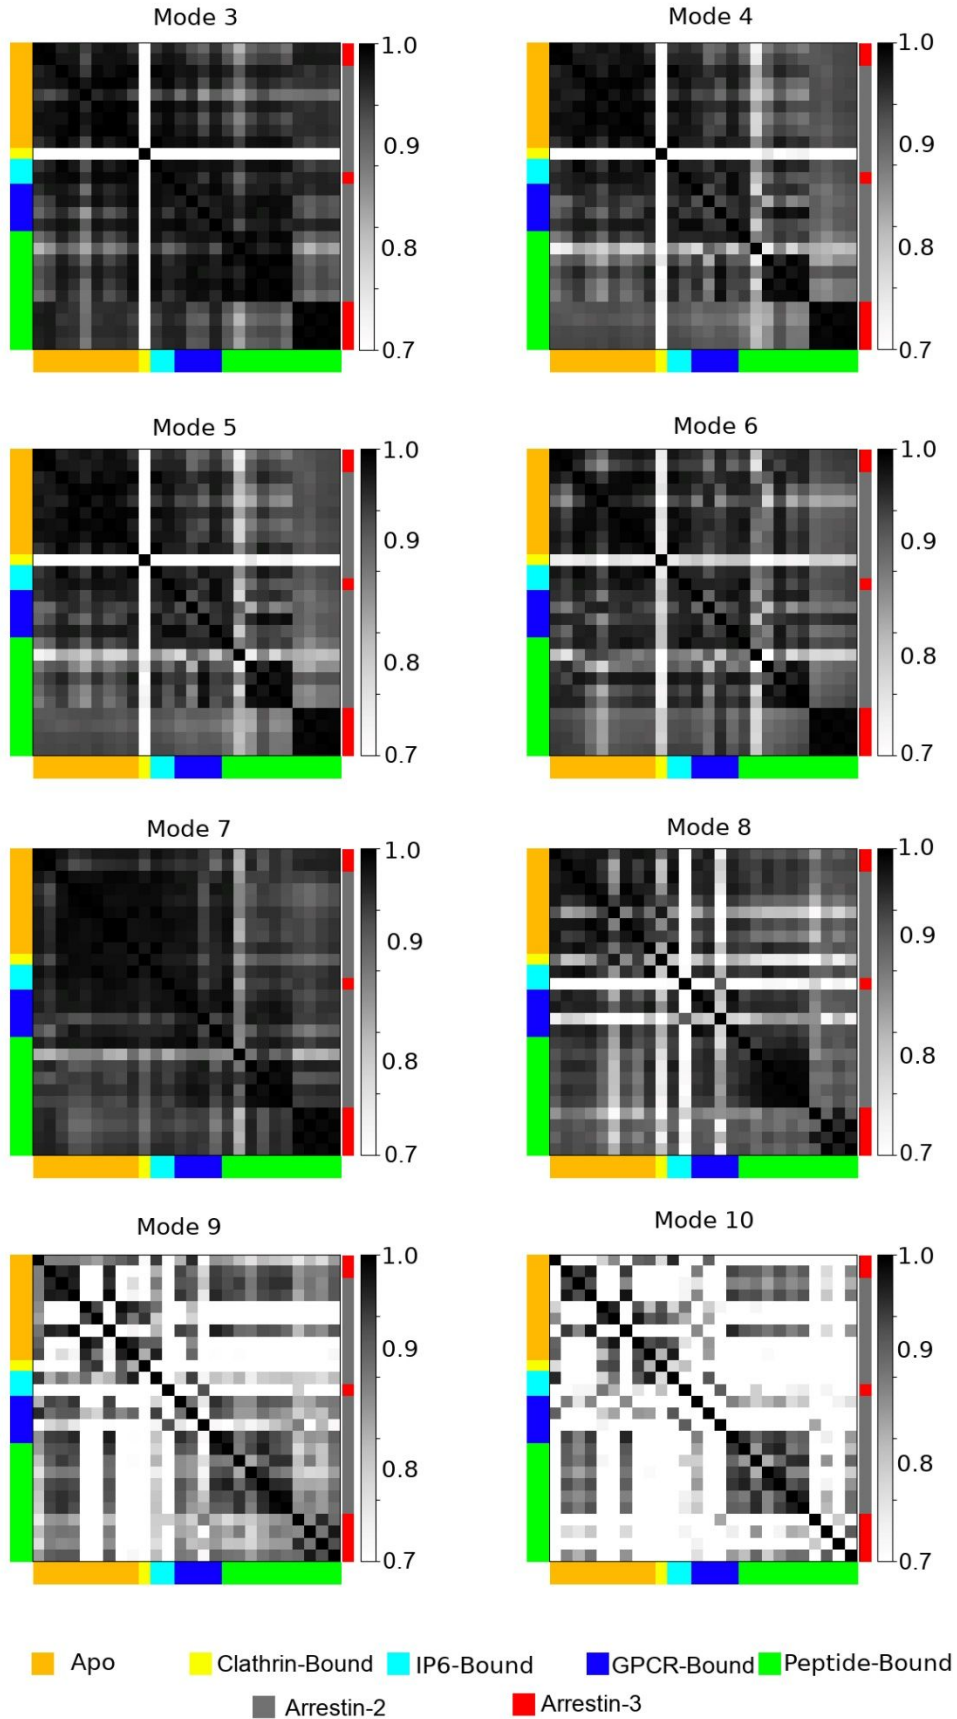

**Figure S2:** A pairwise dot product of the third thru tenth modes of motion as computed by ANM for all 26 structures analyzed. Structures are color coded both by their ligands (left and bottom of graph), or whether they are arrestin-2 (gray) or arrestin-3 (red) (right of graph).

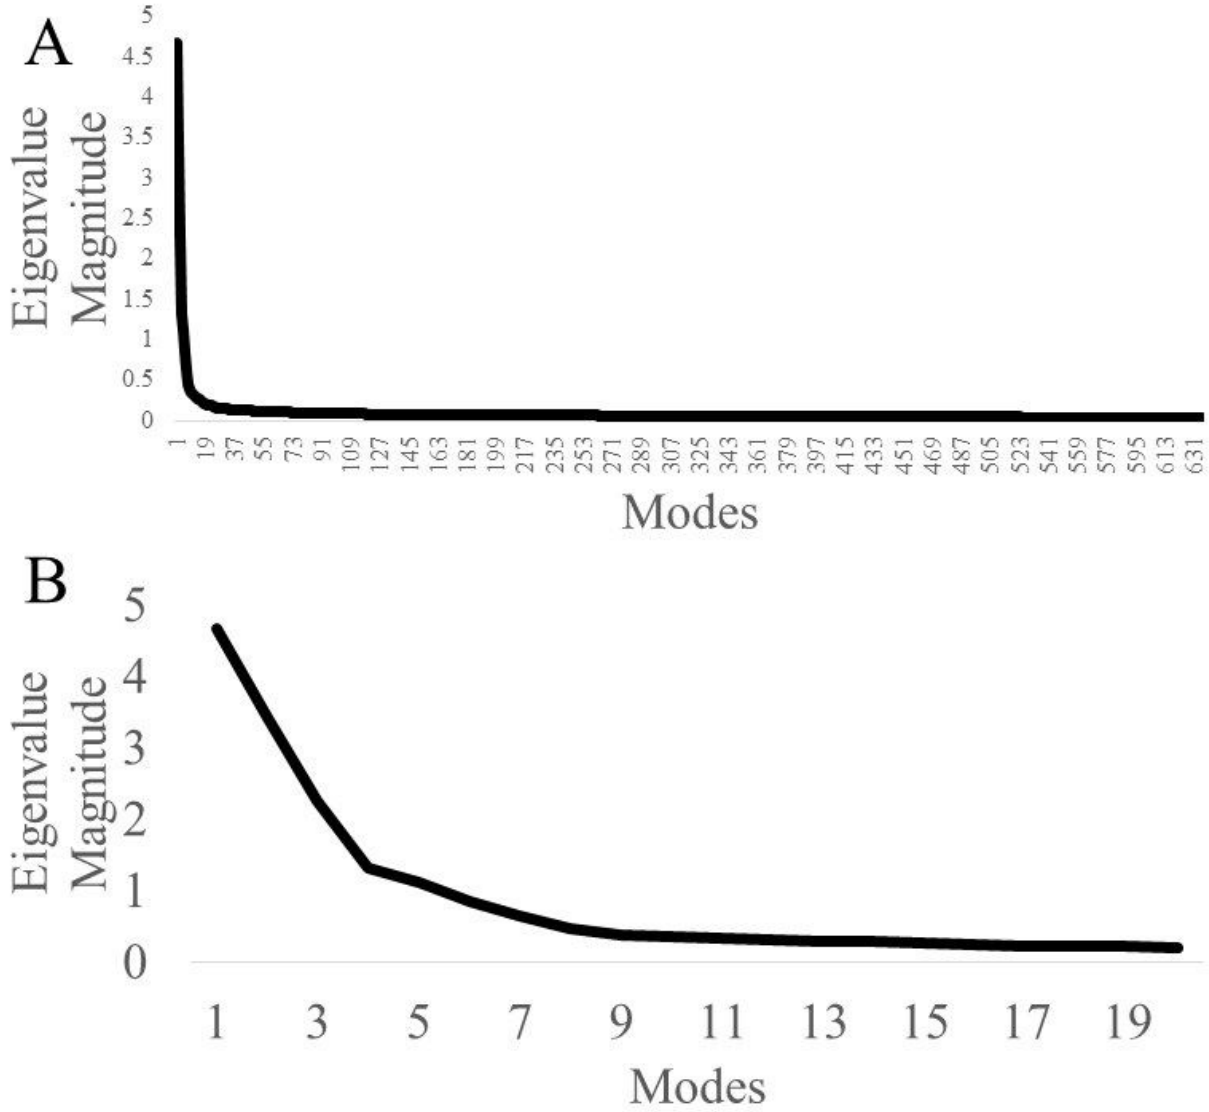

**Figure S3:** The magnitude of the eigenvalues for all 624 modes (A) or a zoom in of the first 20 modes (B). This shows that the eigenvalues magnitude fall off exponentially with respect to mode number.

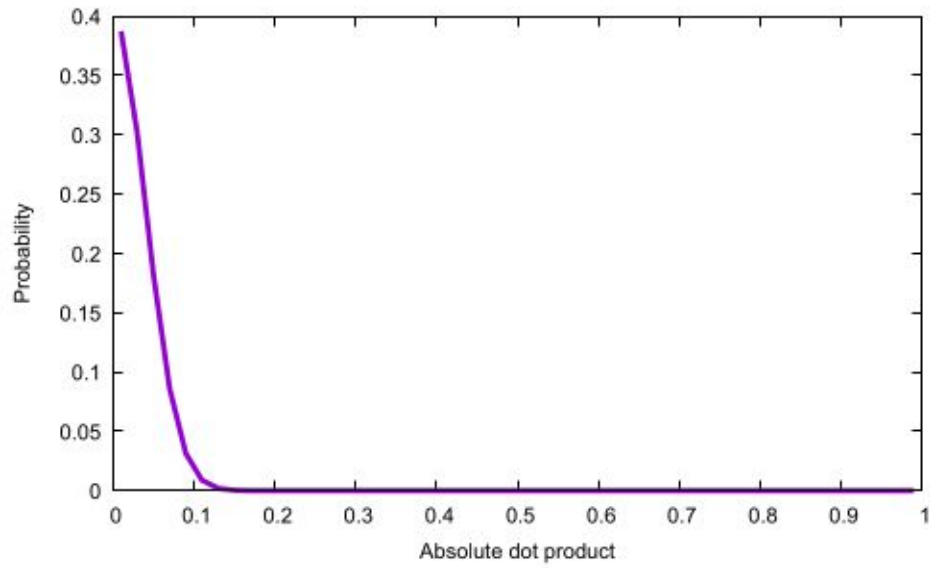

**Figure S4:** the probably of two random normal vectors with 624 elements will return a given absolute dot product.

This shows a steep drop off probability above an absolute dot product of 0.1.

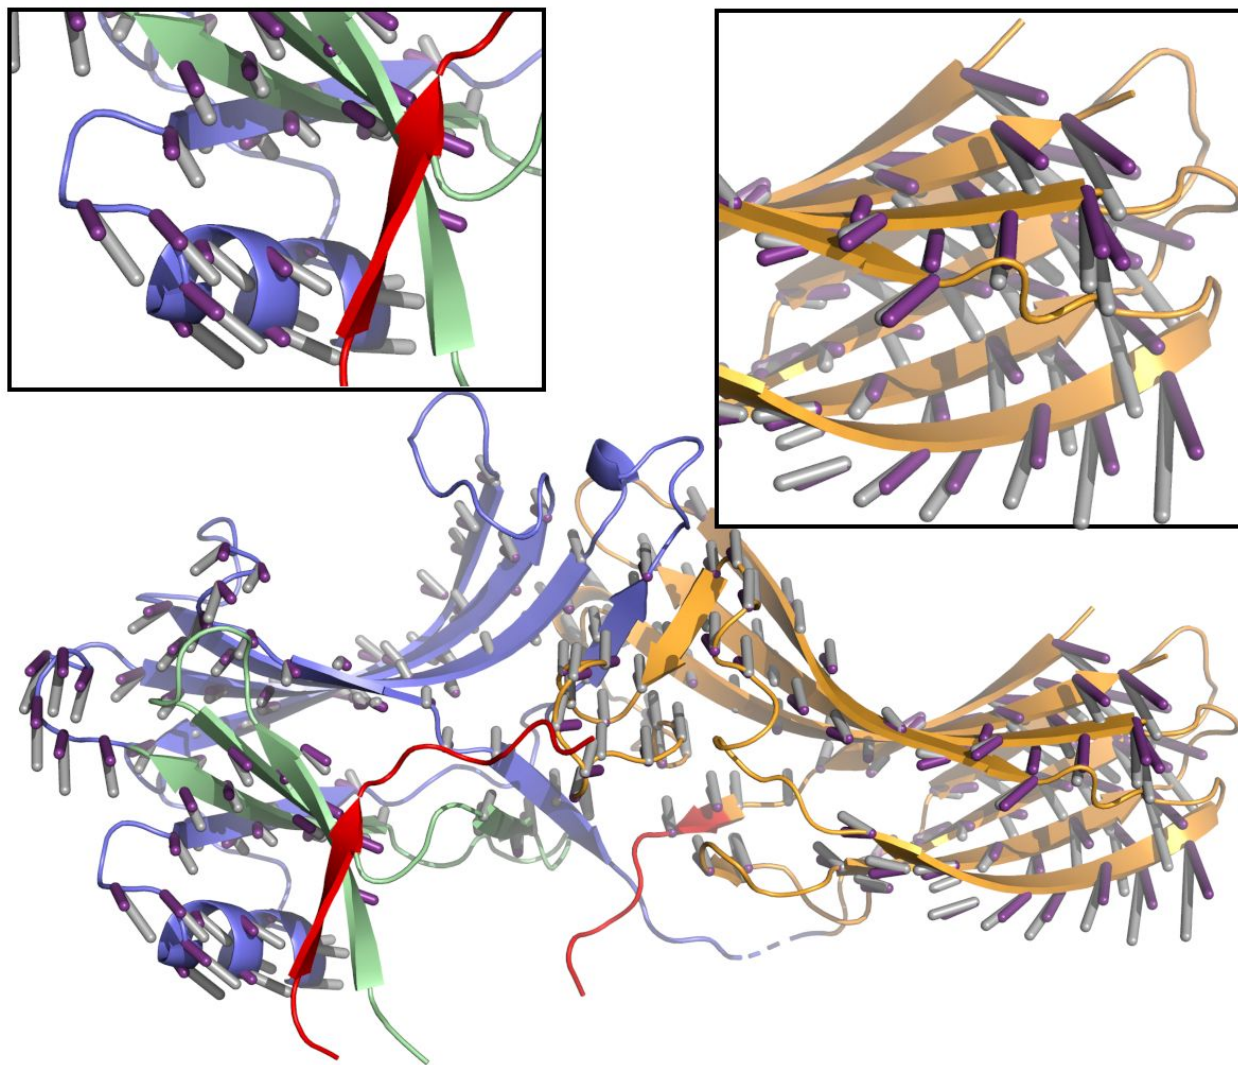

**Figure S5:** The difference in the direction of the modes of motion for two representative structures (2WTR- Apo and 6TKO GPCR-bound). The motions of  $\alpha$ -helix 1 (Top Left Inset) and C-domain  $\beta$ -sheets on the C-loop side (Top Right Inset) are shown.
